# 1 **Modular assembly of polysaccharide-degrading microbial communities in the** 2 **ocean**

3  
4 Tim N. Enke\*<sup>1,2</sup>, Manoshi S. Datta\*<sup>1</sup>, Julia Schwartzman<sup>1</sup>, Nathan Cermak<sup>3</sup>, Désirée  
5 Schmitz<sup>2</sup>, Julien Barrere<sup>2</sup> and Otto X. Cordero<sup>1</sup>

6  
7 <sup>1</sup> Department of Civil and Environmental Engineering, Massachusetts Institute of Technology,  
8 Cambridge, MA, USA

9 <sup>2</sup> Department of Environmental Systems Science, ETH Zurich, Zurich, Switzerland

10 <sup>3</sup> Program in Computational and Systems Biology, Massachusetts Institute of Technology,  
11 Cambridge, MA, USA

## 12 **Abstract**

13  
14  
15 Many complex biological systems such as metabolic networks can be divided into functional  
16 and organizational subunits, called modules, which provide the flexibility to assemble novel  
17 multi-functional hierarchies by a mix and match of simpler components. Here we show that  
18 polysaccharide-degrading microbial communities in the ocean can also assemble in a modular  
19 fashion. Using synthetic particles made of a variety of polysaccharides commonly found in the  
20 ocean, we showed that the particle colonization dynamics of natural bacterioplankton  
21 assemblages can be understood as the aggregation of species modules of two main types: a first  
22 module type made of narrow niche-range primary degraders, whose dynamics are controlled  
23 by particle polysaccharide composition, and a second module type containing broad niche-  
24 range, substrate-independent taxa whose dynamics are controlled by interspecific interactions,  
25 in particular cross-feeding via organic acids, amino acids and other metabolic byproducts. As a  
26 consequence of this modular logic, communities can be predicted to assemble by a sum of  
27 substrate-specific primary degrader modules, one for each complex polysaccharide in the  
28 particle, connected to a single broad-niche range consumer module. We validate this model by  
29 showing that a linear combination of the communities on single-polysaccharide particles  
30 accurately predicts community composition on mixed-polysaccharide particles. Our results  
31 suggest thus that the assembly of heterotrophic communities that degrade complex organic  
32 materials follow simple design principles that can be exploited to engineer heterotrophic  
33 microbiomes.

34  
35 Many biological and technological systems are built by the integration of relatively  
36 autonomous parts, or modules, which can be rearranged to create larger multi-functional  
37 hierarchies<sup>1,2</sup>. Multi-domain proteins, regulatory networks or metabolic networks, to name a  
38 few, evolve in a modular fashion through the mix and match of simpler functional components,  
39 such as protein domains or metabolic pathways, that when combined form systems with more  
40 diverse functional repertoires<sup>3</sup>. In bacteria and *archaea*, for instance, new transcription factor  
41 proteins evolve by fusion of pre-existing signal-sensing protein domains, which monitor the  
42 intracellular environment, and DNA-binding protein domains, which modulate gene  
43 expression, enabling the rapid discovery of novel input-output pairs<sup>4</sup>. Likewise, bacteria and  
44 *archaea* can acquire new catabolic pathways via horizontal gene transfer from distant  
45 organisms and integrate them into a core network of metabolic reactions that generate energy

46 and biomass precursors<sup>5</sup>. This ability to combine functional components or to plug them into  
47 existing infrastructures without disrupting their structure and function, is a key advantage of a  
48 modular design that enables the discovery of new functions by aggregating simpler  
49 components<sup>6</sup>.

50 Much like metabolic and gene networks, microbial communities might be  
51 conceptualized as interconnected systems, whereby populations of microbes interact via direct  
52 chemical communication, metabolic crossfeeding, etc. But while intracellular networks  
53 assemble via evolutionary processes, communities of microbes assemble and disassemble in  
54 ecological timescales via dispersal, colonization and growth<sup>7</sup>. Despite the frequent assembly  
55 and disassembly of microbial communities in variable environmental conditions, it is not well  
56 understood if communities can preserve a core structure across environments, modified only  
57 by the gain or loss of a few functional modules, or if instead, communities experience extensive  
58 species turnover due to a lack of modular organization. While the latter scenario has  
59 traditionally attracted strong interest as it can lead to alternative community states<sup>8</sup>, the potential  
60 for modular assembly in microbial communities has not been explored.

61 Addressing this important problem requires us to start by defining what we here will  
62 call an assembly module for an ecological community. By extension of the notion of an  
63 evolutionary module as used in the context of genome or metabolic network evolution<sup>9</sup>, we  
64 define an ecological assembly module as a group of taxa with similar dynamics and function,  
65 which can be integrated into various communities and perform a given metabolic process with  
66 minimal disturbance to the structure of the system. Although the term “module” has been  
67 applied in ecology to describe cohorts of species with dense patterns of interconnectivity in  
68 pairwise species interaction networks<sup>10</sup>, such a definition is independent of dynamics, and as  
69 such it need not relate to assembly modules as defined here, which in principle can be made of  
70 loosely connected species with similar function and dynamics.

71 In this study, we aim to establish whether the microbial communities that assemble on  
72 micro-scale particles of organic matter in the ocean do so in a modular fashion. In the ocean,  
73 much like in animal guts, heterotrophic microbes break down biopolymer particles, releasing  
74 and recycling bioavailable nutrients<sup>11</sup>. At the micro-scale, the decomposition of these complex  
75 carbohydrates depends on the assembly of communities on particles surfaces, which act as  
76 resources and community scaffolds<sup>12,13</sup>. Previous studies have shown that cross-feeding, in  
77 which an organism’s metabolic byproduct is the primary substrate of another organism, plays  
78 an important role in structuring communities on particles<sup>14</sup>. In this sense, particle-attached  
79 communities can be considered as self-organized metabolic collectives, where a number of

80 species that co-colonize in an ordered fashion consume a primary resource, the particle  
81 biopolymer, and recycle byproducts through a series of trophic interactions.

82 To measure the potential for modular community assembly on particles, we performed  
83 controlled assembly experiments where communities are allowed to self-organize on particle  
84 surfaces, starting from the same species pool and in otherwise identical abiotic conditions, but  
85 changing the primary polysaccharide that makes the particle. This setup allows us to study how  
86 communities reorganize their structure as a function of perturbations in the initial substrate fed  
87 to the system, and to ask whether such reorganization reveals the presence of assembly modules.  
88 To implement these controlled community assembly experiments, we used model marine  
89 particles containing paramagnetic cores, ranging from 50 to 200  $\mu\text{m}$  in diameter (Figure S1).  
90 Our particles were composed of one of four carbohydrates abundant in marine environments:  
91 chitin, alginate, agarose and carrageenan (Figure 1A), as well as combinations of these  
92 substrates. Chitin is frequently found in the shells of crustaceans such as copepods as well as  
93 on the membranes of diatoms<sup>15,16</sup>. Alginate is a structural component of the cell walls of brown  
94 algae, whereas agarose and carrageenan are enriched in seaweeds<sup>17</sup>. Particles of the different  
95 substrate types were incubated in natural seawater to perform community-capture experiments,  
96 where particles act as micro-scale community scaffolds that can be magnetically pulled down  
97 for genomic analysis or cultivation<sup>13</sup>.

98

## 99 **Results**

100 Previous work with chitin model particles has shown that community assembly proceeds in a  
101 reproducible succession, whereby early colonizers degrade chitin and facilitate the invasion of  
102 secondary consumers that lack enzymes required to hydrolyze chitin<sup>14</sup>. Across the four single-  
103 substrate particle types, we found that in all cases community assembly proceeded via rapid  
104 successional dynamics, indicating that the type assembly dynamics are not dependent on initial  
105 substrate. To characterize these dynamics, we collected  $\sim 1000$  particles at each of twelve time  
106 points, from 0 to 204 hours, and sequenced their surface-attached communities using 16S rRNA  
107 gene amplicon sequencing (Methods). With this data we calculated Amplicon sequence  
108 Variants (ASVs) using the DADA2 pipeline<sup>18</sup>, identified the most abundant ASVs – comprising  
109 at least 1% of sequenced reads for at least one time point – and ordered them by the time at  
110 which they reached their maximum abundance within the communities (Figure 1B). On all four  
111 particle types tested, most of taxa present at high abundance in the first 12 hours decline  
112 substantially in abundance by 72-96 hours, indicating a remarkably similar rapid community  
113 turnover.

114

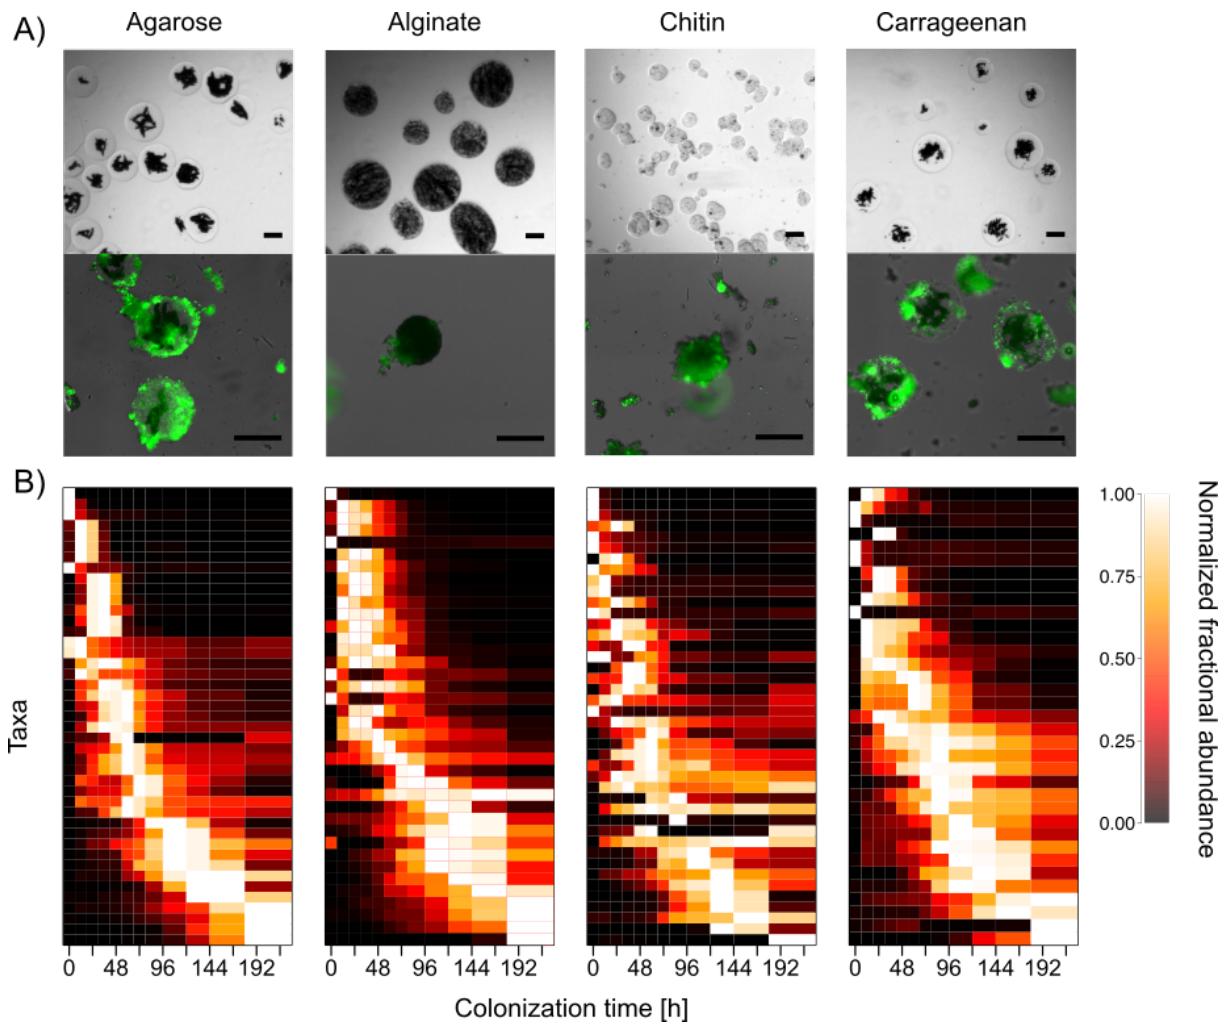

115

116

117 **Figure 1. Rapid successional dynamics on four different marine polysaccharides.** A) Paramagnetic  
118 hydrogel beads made of agarose, alginate, chitin, or carrageenan are incubated in natural, unfiltered  
119 coastal seawater. Upper panels are phase contrast images of the particles (with magnetite cores in black).  
120 Lower panels are fluorescence microscopy images of particles stained with Syto9 after 136 hours of  
121 incubation, revealing dense microbial communities on particle surfaces. Scale bar corresponds to 100  
122  $\mu\text{m}$ . B) Successional dynamics on each particle type. Taxa (rows) correspond to Amplicon Sequence  
123 Variants (ASVs) and are ordered by time at which they attain their maximum abundance. The data  
124 correspond to the relative frequencies of each taxon normalized by rows. Only ASVs whose maximum  
125 relative frequency is  $>1\%$  are shown.

126

127 Despite the overall similarity in colonization dynamics across particle types, the  
128 abundance and dynamics of individual ASVs on different particle types was not necessarily  
129 conserved. To quantify differences in ASV abundance across particle types, we calculated a  
130 “niche breadth” index for the ASVs. To this end, for each ASV,  $i$ , and each particle type,  $j$ , we

131 computed the geometric mean frequency over time,  $f_{ij}$ , renormalized the mean frequencies so  
132  $\sum_j f_{ij} = 1$  and calculated the entropy of the mean ASV abundance over particle types, -  
133  $\sum_j f_{ij} \log_2(f_{ij})$  (Methods). The entropy represents an index that described how uniformly the  
134 ASV was distributed over the four substrates. ASVs that appeared only on one particle type had  
135 a niche breadth score = 0, whereas ASVs that were equally prevalent across all particle types  
136 ( $f_{ij} = 0.25 \forall j$ ) had a niche breadth score index of 2.

137 We found that within particle-associated communities the distribution of the niche  
138 breadth indexes was bimodal (top histogram in Figure 2A). Using a Gaussian mixture model to  
139 cluster ASVs by distribution mode (Methods), we found that 36% of the ASVs grouped into a  
140 cluster of narrow-range taxa (niche breadth score < 0.18) and 42% into a cluster of broad-range  
141 taxa (niche breadth score > 1.52). Moreover, an unsupervised hierarchical clustering of ASVs  
142 based on their temporal dynamics across particle types allowed us to further partition narrow-  
143 range taxa by the substrate they appeared on (heat map in Figure 2A). The best partitioning of  
144 the data divides ASVs into five natural blocks, one for the broad-range taxon set and one block  
145 of narrow-range taxa for each of the four particle types (Methods). The broad-range block  
146 encompassed organisms that were not only highly prevalent across all particle types, but whose  
147 dynamics were highly correlated across substrates (average Spearman correlation = 0.54 across  
148 four particle types, Figures S2-S3). On average, these broad-range taxa increased in frequency  
149 towards later time points, causing community composition across particle types to first diverge  
150 due to the colonization of narrow-range species (reaching maximum divergence at ~24h) before  
151 converging to a set of broad-range taxa (Figure S4, S5). Overall, the comparison of the assembly  
152 dynamics across particle types shows that community assembly on particles can be coarse-  
153 grained in terms of blocks of species with correlated dynamics, representing putative assembly  
154 modules, which are either highly specific or unspecific to the primary polysaccharide that feeds  
155 the community.

156

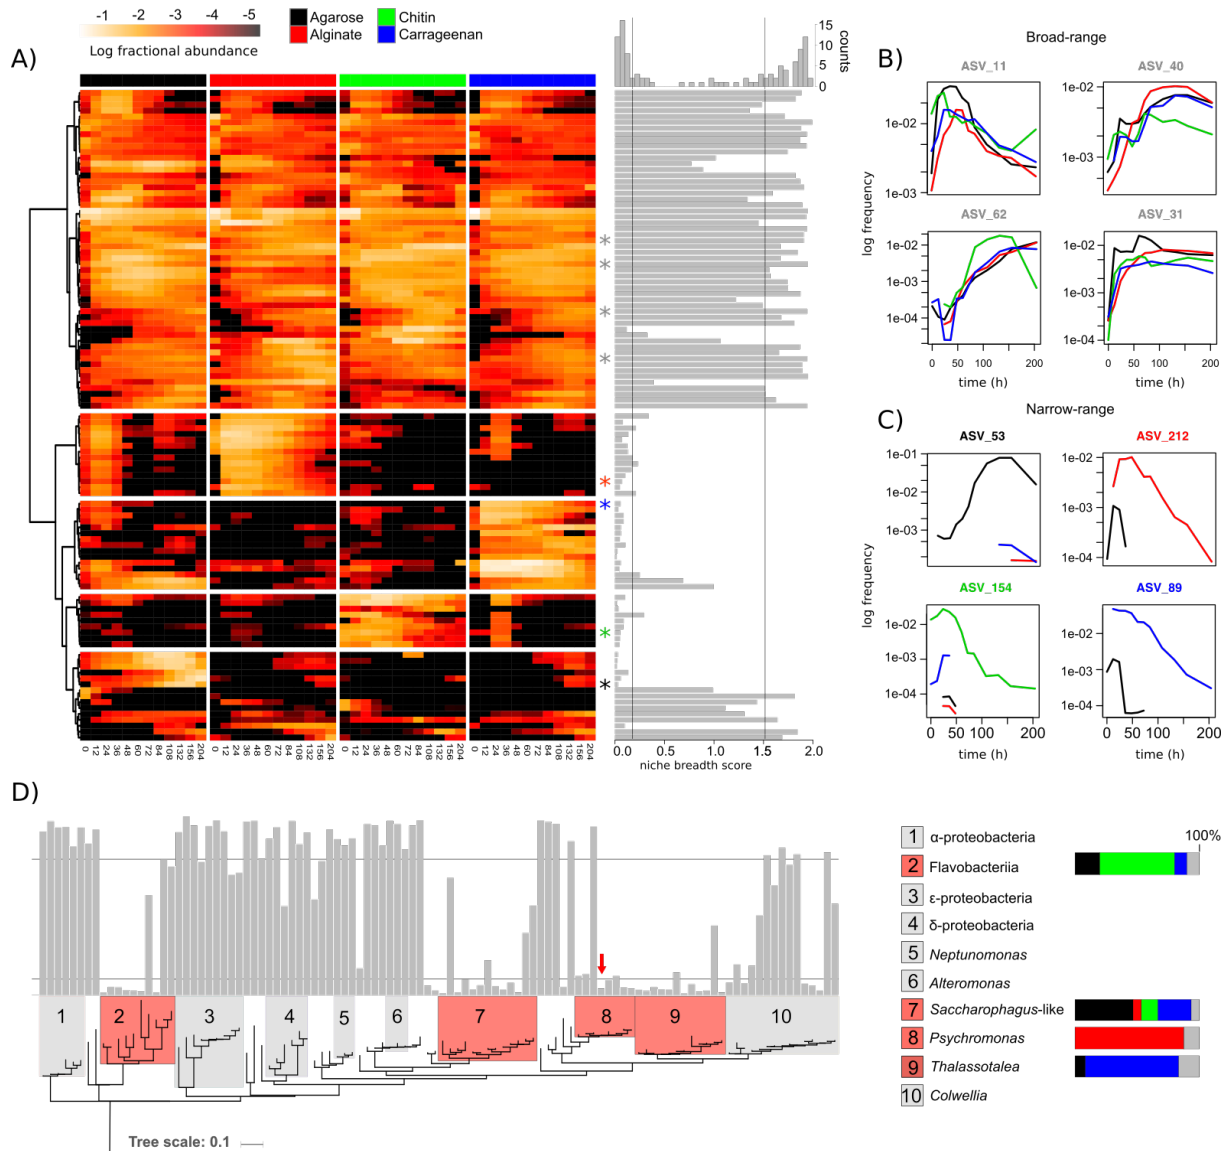

157

158 **Figure 2. Unsupervised detection of narrow-range and broad-range taxa.** **A.** Clustering of taxa by  
 159 occurrence across four particle types. The data show that taxa can be divided in a large cluster of broad-  
 160 range taxa and smaller clusters of narrow-range taxa. The niche breadth score (gray bars) shows that the  
 161 distribution of niche breadths is bimodal (see histogram on top). **B-C)** Dynamics of broad-range ASVs  
 162 (B), four cases, and narrow-range ASVs (C), one case for each substrate. The position of these specific  
 163 ASVs are marked with an asterisk (\*) in the heat map in A. The color of the asterisk corresponds to the  
 164 color coding of substrates (legend in panel A), with the broad-range ASVs colored in gray. Figures S2  
 165 and S3 show the dynamics of all broad-range and narrow-range taxa, respectively. **D)** Phylogenetic  
 166 distribution of narrow- and broad-range taxa. Phylogenetic clusters marked with numbers correspond to  
 167 the largest monophyletic clades, defined at the class level for groups 1,2 and 3, and at the genus level  
 168 for groups 4-10, all of which fall within the  $\gamma$ -proteobacteria class. In red are those monophyletic clades  
 169 with a high incidence of narrow-range taxa (>50%). Tree rooted with *Sulfolobus* as outgroup (not  
 170 shown). Red arrow points to the position of psychB3M02, the alginate degrader mentioned in the main  
 171 text. Panel on the right shows the taxonomic description of the clades and the distribution of ASVs  
 172 across each of the four narrow-range clusters with colored bar plots.

173

174 A phylogeny of the ASVs showed that narrow- and broad-range blocks were associated  
175 with distinct taxonomic groups and distinct metabolic potentials. Narrow-range blocks mapped  
176 primarily to four taxonomic groups: the family *Flavobacteriaceae*, which contributed to most  
177 chitin-associated ASVs, the genera *Sacharophagus* and its close relatives (e.g. *Terednibacter*),  
178 contributing most carrageenan-associated ASVs, *Psychromonas*, with virtually all ASVs in the  
179 alginate block, and *Thalassotalea*, contributing most carrageenan-associated ASVs (Figure 2D,  
180 clades 2,7,8 and 9). Marine bacteria of the class *Flavobacteriia* and the genus *Sacharophagus*  
181 are among the most well-known degraders of polysaccharides in the ocean<sup>19–22</sup>, suggesting that  
182 these narrow-range taxa are specialized primary degraders. To gain further insight into the  
183 genomic and metabolic differences between narrow and broad-range taxa that could explain  
184 their dynamics, we cultured 874 bacterial isolates from particles and sequenced their 16S rRNA  
185 V4 region (Methods and SOM). Out of these, 247 isolates had a 100% identity match to 12  
186 broad-range ASVs. Only 2, however, mapped to 2 narrow-range ASVs (SOM). We focused our  
187 efforts on one of these narrow-range isolates, which we named psychB3M02, and belonged to  
188 the genus *Psychromonas* in the alginate-specific block (marked with a red arrow in Figure 2D).  
189 In agreement with its specific association with alginate particles, psychB3M02 was able to grow  
190 on alginate as sole carbon source (Figure 3A). Moreover, HMM-based searches of glycosyl  
191 hydrolase (GH) and polysaccharide lyase (PL) families against its genome identified multiple  
192 copies of alginate lyases (PL7, 8 copies), and oligoalginate lyases (PL15, PL17, 4 copies), but  
193 found no other genes coding secreted enzymes for degrading other marine polysaccharides such  
194 as chitin (GH18, GH19, GH20) or agarose (GH16) (Table S1). The absence of other  
195 polysaccharide degrading enzymes suggests that psychB3M02 has a specialized role as a  
196 primary degrader of alginate, in agreement with its narrow niche range.

197 By contrast, none of three isolates of the *Rhodobacteraceae* ( $\alpha$ -proteobacteria), a clade  
198 exclusively found in the broad-range block (Figure 2D, clade 1), encoded genes to produce  
199 hydrolytic enzymes (Table S1). Two members of this clade, however, a *Loktanella*,  
200 lotkaD2R18, and a *Ruegeria*, ruegeA3M17, had the machinery to import and utilize  
201 oligosaccharides of alginate and chitin, respectively, suggesting a potential role as ‘free-riders’.  
202 By contrast, the third organism, phaeoC3M10, classified as a *Phaeobacter*, had no genes to  
203 convert cytoplasmic intermediates into central metabolic substrates, indicating that this strain  
204 cannot harvest oligosaccharides and instead relies on metabolic intermediates released by other  
205 members of the community. To experimentally assess the potential for facilitation between  
206 narrow- and broad-range taxa, we collected spent media from psychB3M02 grown to peak cell

207 density on alginate as the sole carbon source and asked whether this media would support  
208 growth of a panel of five broad range taxa that were unable to degrade and grow on alginate by  
209 themselves. We tested the three *Rhodobacteraceae* discussed above plus a *Marinobacter* and a  
210 *Vibrio* (Fig. 3A). In accordance with our expectation, all five broad-range taxa were able to  
211 grow on the spent media, even without supplementing it with additional nutrients (Figure 3A).  
212 This confirms that in an environment where alginate is the sole carbon source, narrow-range  
213 alginate degraders can facilitate the growth of broad-range, non-degrading taxa.

214 To learn more about the exact mechanisms of facilitation and its apparent non-specific  
215 nature, we performed a targeted metabolomic analysis<sup>23</sup> of psychB3M02's spent media before  
216 and after growth of non-degrading broad range taxa (Methods), which showed that non-  
217 degraders support their growth by taking up multiple small metabolic byproducts. For this  
218 analysis, we picked two non-degrading strains whose genomes suggested divergent metabolic  
219 capabilities: the *Loktanella lotkaD2R18* and the *Marinobacter marinF3R11*. We identified  
220 compounds that were produced by psychB3M02 and consumed by one of the non-degraders in  
221 at least two out of three replicates. Out of 82 possible compounds, we detected 11 compounds  
222 that fulfilled this criterion: these included six amino acids (Figure 3B), the amino acid precursor  
223 3-methyl-2-oxopentanoic acid, TCA cycle intermediates malate and succinate, nucleosides and  
224 nucleotides (Tables S2-S4). This general consumption of multiple metabolic intermediates was  
225 observed for both marinF3R11 and lotkaD2R18. Some metabolites that could support growth  
226 of non-degraders were also released to the medium by non-degraders (Figure 3B). In particular,  
227 marinF3R11 secreted citrate, consistent with the prediction that this organism uses a reductive  
228 TCA cycle (Table S1). Overall, these data suggest that simultaneous utilization of a variety of  
229 metabolic intermediates is a robust ecological strategy for broad-range organisms, which could  
230 enable their growth in a manner that is not specific to the carbohydrate fed to the community.

231



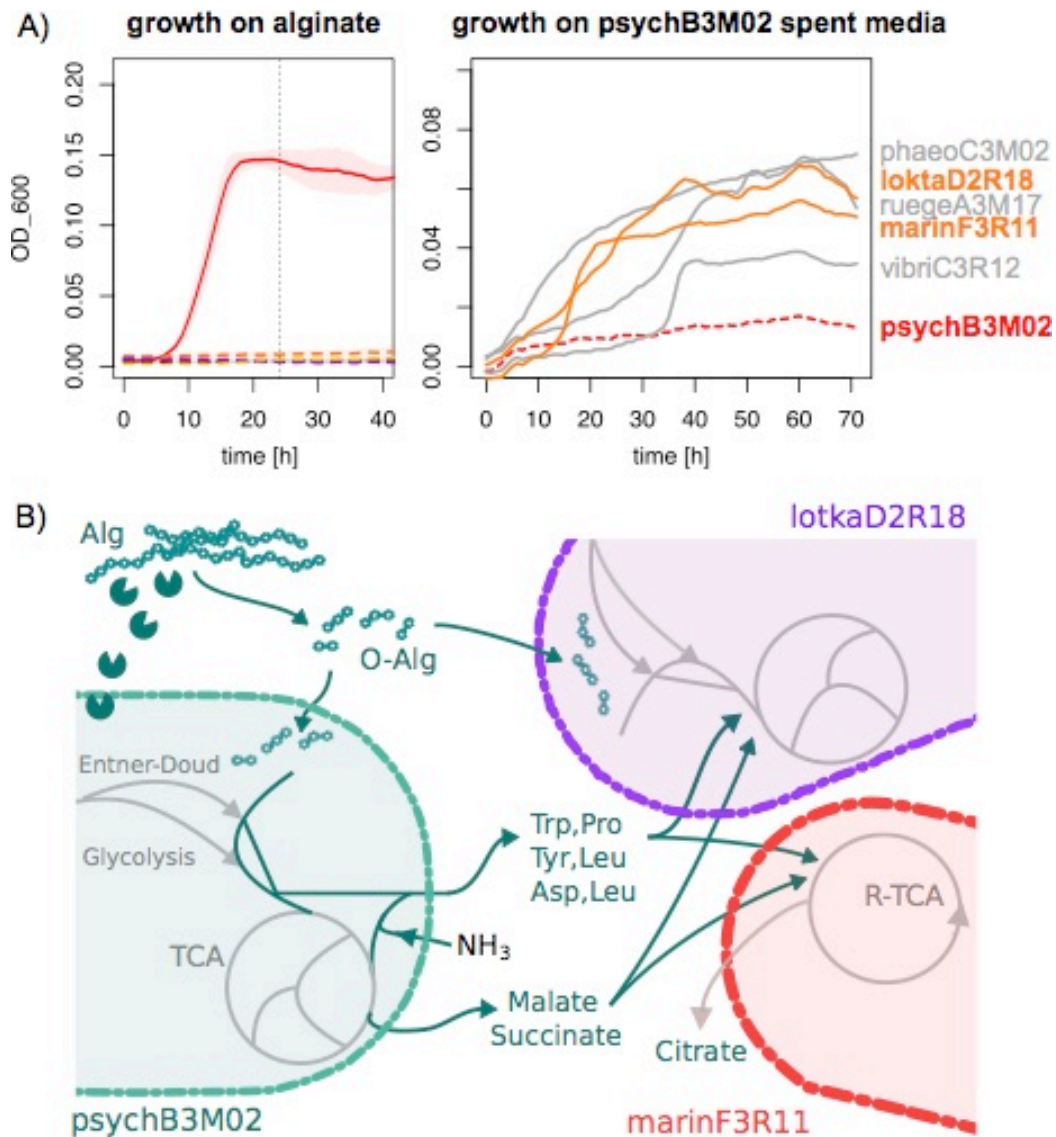

232

233 **Figure 3. Facilitation of the broad-range module is generic and mediated by multiple amino acid**

234 **and organic acid excretions. A).** Growth curves of a narrow-range degrader, psychB3M02, and 5

235 broad-range non-degraders on alginate (left) and on spent media of psychB3M02. **B)** Model of

236 possible cross-feeding pathways inferred from full genomes of psychB3M02, lotkaD2R18 and

237 marinF3R11, as well as from targeted metabolomics data (Tables S2-S4).

238

239 Having identified five distinct functional components, one for each primary substrate

240 and one for the group of cross-feeding broad-range taxa, as well as their mechanism of

241 interaction, we asked whether communities capable of degrading multiple polysaccharides

242 could be assembled in modular fashion, that is, by a simple aggregation of polysaccharide-

243 specific modules. If this were the case, we would expect that the composition and dynamics of

244 a community of higher complexity, capable of degrading multiple primary substrates, should

245 be well approximated by a simple linear combination of the components we have identified. To

246 test this hypothesis, we examined community assembly dynamics on particles made of substrate

247 mixtures and compared these dynamics to the one observed on the corresponding single  
248 substrate particles. In particular, we tested two mixed particle types: agarose-alginate and  
249 agarose-carrageenan (50% of each substrate by mass), which were incubated in the same  
250 seawater and conditions used for single substrate particles.

251 Consistent with the notion of community assembly by aggregation of polysaccharide-  
252 specific modules, a simple linear combination of the species abundances on each single  
253 substrate accurately predicted the composition of communities assembled on mixed particles  
254 (Figure 4A). To quantify this, we fitted the vector of ASV geometric mean frequencies on the  
255 mixed particles with a linear combination of the vectors of the corresponding single substrate  
256 particles (SOM). The best fitting linear model for the agarose-alginate mixture,  
257  $\overrightarrow{ASV}_{\text{agarose-alginate}} = \alpha \overrightarrow{ASV}_{\text{agarose}} + \beta \overrightarrow{ASV}_{\text{alginate}}$ , had an  $R^2$  of 0.84, and the  
258 corresponding model for agarose-carrageenan an  $R^2$  of 0.74, showing that a linear combination  
259 had high-predictive power (Figure 4A). To rule out the possibility that the result was driven by  
260 broad-range taxa, we calculated the Spearman correlation coefficient between model and data  
261 only for the relevant narrow-range ASVs, finding values of 0.75 and 0.83 for the agarose-  
262 alginate and agarose-carrageenan communities, respectively, showing that the results hold for  
263 narrow-range taxa alone. Furthermore, we also fitted a model with an explicit interaction term  
264 to test if this would improve the results. We found that for the agarose-alginate such a nonlinear  
265 model had an inferior goodness-of-fit compared to the simple linear combination (SOM). In the  
266 case of agarose-carrageenan particles, the nonlinear model (nlm) improves the fit relative to the  
267 linear model (lm), but only marginally ( $R^2 = 0.76$  vs  $0.74$  in the lm) and the model is only  
268 weakly nonlinear (nlm  $\sim$  lm<sup>0.98</sup>) (SOM). This analysis was based only on the average abundance  
269 of the ASV over time, however, when we considered their dynamics we found these were also  
270 highly correlated between single and mixed particles, in a manner consistent with a model of  
271 community assembly by simple linear aggregation of ecological modules (Figure 4BC). Across  
272 all alginate, agarose and carrageenan narrow range ASVs, the median Spearman correlation  
273 between the single- and mixed-substrate time dynamics ranges between 0.65 and 0.96 (Table  
274 S5). Overall, these results show that there is minimal interference between narrow-range  
275 modules, such that a linear combination model provides a good prediction of the assembly of  
276 the community on mixed substrate particles. This lack of interference, combined with the ability  
277 of broad-range modules to “plug-in” to narrow-range ones in a substrate independent manner,  
278 leads to the modular assembly of polysaccharide-degrading communities with a larger  
279 repertoire of metabolic functions (Figure 4D)

280

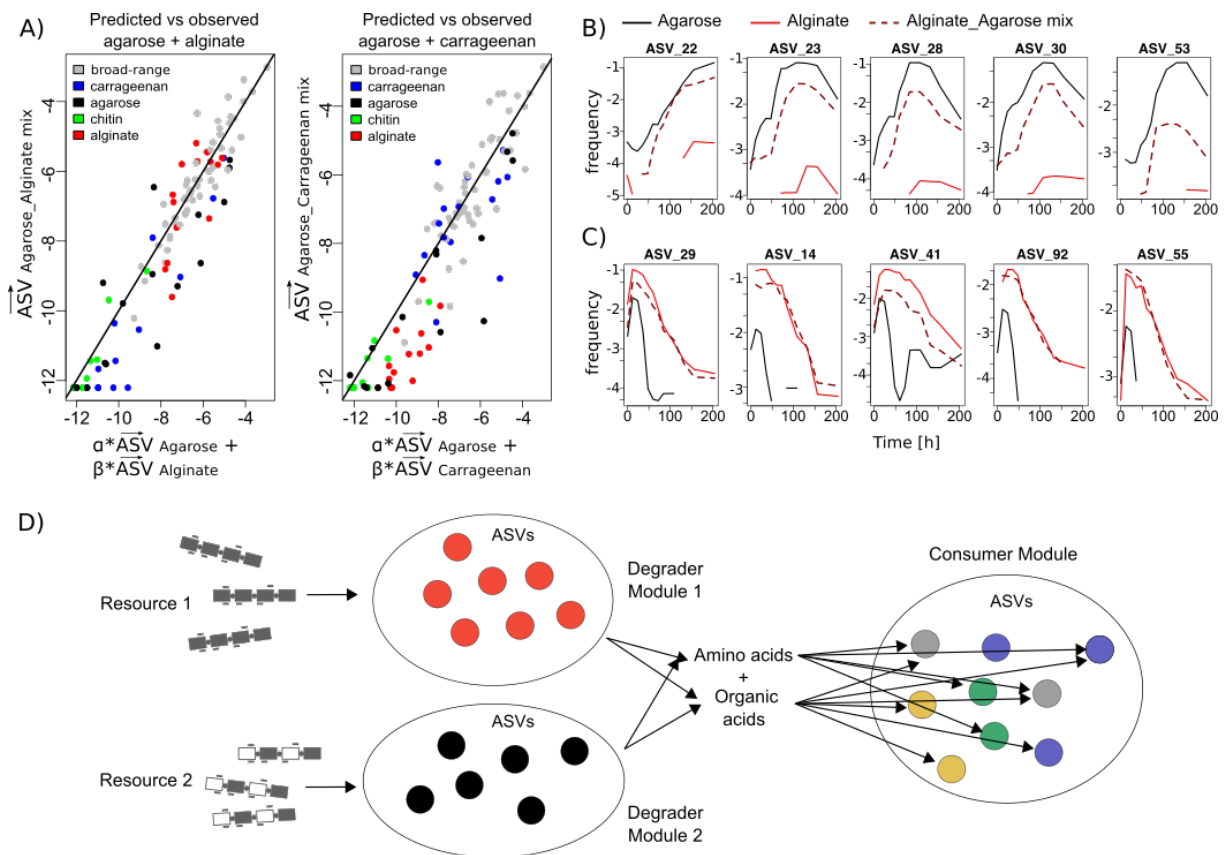

281  
 282 **Figure 4. Communities assemble by linear combination of modules.** **A)** ASV frequencies in mixed  
 283 particles plotted in log-log scale against the predicted ASV frequencies, based on a linear combination  
 284 of single substrate vectors. The fitted coefficients are  $\alpha = 0.67$ ,  $\beta = 0.40$  for agarose-alginate and  $\alpha =$   
 285  $0.89$ ,  $\beta = 0.11$  for agarose-carrageenan. **B-C).** Similar ASV trajectories in mixed vs. single substrate  
 286 particles for agarose (B) and alginate (C) specific ASVs. Solid lines depict trajectories in single substrate  
 287 particles and dashed lines in mixed particles. The median Spearman correlation between the dynamics  
 288 of agarose-specific ASVs on single and mixed substrate particles is 0.86 (B), and for the alginate-  
 289 specific ASVs 0.96 (C) (Table S5). **D)** Model of modular assembly, which mirrors the structure of  
 290 metabolic pathways. Peripheral, narrow-range modules perform the degradation of complex  
 291 biopolymers, whereas the core, broad-range module processes simple metabolic intermediates.  
 292

293 In this study, we have shown that, despite the myriad species present in polysaccharide  
 294 degrading communities, these systems can be coarse-grained into functional components,  
 295 which assemble modularly into a variety of arrangements giving rise to communities of  
 296 different functional complexity. Modules are divided into two classes, those encompassing  
 297 species capable of breaking down polymers and those that encompass species that can live off  
 298 metabolic byproducts. This subdivision mirrors the modular organization of metabolic  
 299 pathways, in which sets of genes coding for hydrolytic enzymes, transporters, etc. can be  
 300 horizontally acquired by an organism and integrated into its metabolic network as long as the  
 301 products of the metabolic conversions performed by the integrated module are compatible with

302 core metabolic pathways, such as glycolysis<sup>5</sup>. In this way, simple metabolic byproducts act as  
303 a common interface for pathways to interact, enabling organisms to acquire a variety of  
304 degradation modules, and to quickly modify their resource utilization profile<sup>5,24</sup>. Similarly, our  
305 data suggests that ecological modules of particle degrading bacteria interact with modules of  
306 byproduct consumers through multiple central metabolites, which form a common interface  
307 that might allow consumers to grow regardless of the initial polysaccharide fed to the  
308 community (Figure 4D). Interestingly, modules can have characteristic phylogenetic  
309 distributions, with taxa such the genus *Psychromonas* or the family *Flavobacteriaceae* being  
310 strongly associated with specific substrates. However, these associations between taxonomy  
311 and function need not necessarily be stable, as members of these taxonomic groups have been  
312 found that are specialized to degrade different polysaccharides<sup>25</sup>. In sum, our work suggests  
313 that modularity could play an important role in the assembly of natural microbial communities,  
314 and that it is a property that can emerge from the underlying metabolic organization of the  
315 community members. Future work should seek to validate this principle across more functional  
316 dimensions and to explore its applicability in the design of synthetic consortia.

317

## 318 **Methods**

### 319 **Sampling and incubation**

320 Coastal ocean surface water samples were collected in 2015 from Canoe Beach, Nahant,  
321 Massachusetts, USA; 42° 25'11.5"N, 70° 54'26.0"W. For each particle type, we set up triplicate  
322 800 ml seawater incubations with model particles, using 1L wide-mouth Nalgene bottles.  
323 Particles, which had been stored in artificial sea water (Sigma, #S9883) with 20 % ethanol,  
324 were washed twice with artificial seawater to remove the ethanol and inoculated at a  
325 concentration of 100 particles per mL. Bottles were rotated overhead at room temperature and  
326 a speed of 7.5 rpm for 10 days. At t = 0, 12, 24, 36, 48, 60, 72, 108, 132, 156, 180, 204 hours,  
327 10 mL (~1000 particles) were sampled from each replicate incubation and particles collected  
328 by magnetic separation for DNA sequencing and isolation.

### 329 **16S amplicon data analysis**

330 16SrRNA sequencing libraries were prepared in house according as in <sup>14</sup> to the protocol  
331 described in the SOM. Sequencing was done at the BioMicroCenter at MIT. To identify  
332 Amplicon Sequence Variants (ASVs) from the 16SrRNA amplicon reads, we used the DADA2  
333 pipeline<sup>26</sup>. We developed a pipeline based on the DADA2 developers' ["Big Data: Paired-end"  
334 workflow] ([http://benjjneb.github.io/dada2/bigdata\\_paired.html](http://benjjneb.github.io/dada2/bigdata_paired.html)), which has been deposited in  
335 a public repository on [Github]([https://github.mit.edu/josephe/dada2\\_pipeline](https://github.mit.edu/josephe/dada2_pipeline)). Briefly, a  
336 parametric error model is learned from the sequencing data, using a subset of two million reads

337 drawn randomly from all those sequenced. Then, this error model is used to "denoise" samples  
338 by identifying erroneous sequence variants and combining them with the sequence variant from  
339 which they most likely originated. All other read processing steps -- including merging paired-  
340 end reads, trimming primer sequences, and dereplicating reads -- were performed with functions  
341 from the R Bioconductor "dada2" package.

342 For our analysis, we focused on the abundant ASVs, defined as those with a frequency  
343 > 1% in at least one sample across all samples, including replicates, time points and single  
344 substrate particle types. The resulting 107 ASVs were used throughout our analysis. Replicates  
345 were combined by calculating the weighted average frequency for every ASV, using the read  
346 counts of that sample as weights. We smoothed the data with a running median filter, window  
347 size = 3 and renormalized to work with mean frequencies.

### 348 **Niche breadth index**

349 To study the prevalence of each ASV across different particle types, we devise a niche breadth  
350 index. We calculated the geometric mean frequency ASV on a particle type,  $f_{ij} =$   
351  $e^{\langle \log(f_{ij}(t)) \rangle}$ , where  $f_{ij}(t)$  is the frequency of ASV  $i$  at time  $t$  on particle type  $j$ . We added  
352 pseudo counts ( $10^{-6}$ ) to  $f_{ij}(t)$  to account for zeroes. With the normalized geometric mean  
353 frequencies,  $g_{ij} = \frac{f_{ij}}{\sum f_{ij}}$  we calculated a niche breadth index over  $j$  using the  
354 entropy:  $-\sum g_i \log(g_i)$ . We use the R function `Mclust` to group our ASVs into three optimal  
355 groups according to their niche breadth index. The niche breadth index cutoff values for the  
356 groups are < 0.18 and > 1.52. The three resulting groups have 38, 24 and 45 members,  
357 respectively.

### 358 **Hierarchical clustering of ASV trajectories**

359 We cluster the most abundant ASVs based on their log-transformed frequencies across all time-  
360 points and all particle types. We used the R function `hclust` with the clustering method '`ward.D`'  
361 and Euclidean distances. To evaluate the best cutoff for our hierarchical clustering, we cut the  
362 tree generated by '`hclust`' into 2-15 groups using the '`cutree`' function in R. We used use the  
363 silhouette function from the R package '`cluster`' to evaluate the clusters generated. Our analysis  
364 shows that 5 clusters are the optimal partitioning of our data.

### 365 **Phylogenetic tree of ASVs**

366 To create a phylogenetic tree of the top 1% ASVs, we first aligned the 16S V4V5 sequences on  
367 Silva's SINA alignment server (<http://www.arb-silva.de/aligner/>) with standard settings, the  
368 option *Search and Classify* enabled with *minimum identity with query sequence* = 0.9 and  
369 *classification: rdp*. After removing non-informative positions from the alignment we used

370 FastTree 2.1<sup>27</sup> with the options -gtr -n) to infer an approximate maximum-likelihood  
371 phylogenetic tree which we upload to iTol<sup>28</sup>.

### 372 **Isolation of bacteria attached to particles**

373 After 1.5, 3.5 and 6.5 days of incubation, particles were sampled, separated from the sea water  
374 and washed as described above and split into 1:1, 1:10 and 1:100 dilutions in artificial sea water  
375 (Sigma, #S9883). Dilutions were vortexed for 20 seconds and plated using glass beads (Zymo  
376 #S1001) on 1.5 % agar (BD #214010) plates with (1) Marine Broth 2216 (Difco #279110) or  
377 (2) Tibbles-Rawling minimal media as described in <sup>14</sup> with carbon sources specific for the  
378 particle type: 0.05 % alginate, 0.04 % carrageenan, 0.1 % glucosamine, or plain agar. Following  
379 two days of incubation at room temperature, at least 16 colonies per particle and plate carbon  
380 source type were picked and re-streaked twice on Marine Broth 2216 1.5 % agar plates for  
381 purification. To obtain stocks, purified isolates were grown in deep well plates with liquid  
382 Marine Broth 2216 for 48 hours, shaking at 300 rpm at room temperature. The liquid culture  
383 was frozen at -80 °C for further characterization. Taxonomic classification was done using the  
384 16S rRNA and the RDP database (<https://rdp.cme.msu.edu/classifier/classifier.jsp>)<sup>29</sup>.

### 385 **Crossfeeding experiments**

386 The alginate-degrading strain psychB3M02 was streaked on Marine Broth 2216 1.5% agar  
387 plates and incubated at 25°C. After 48 hours single colonies were picked and grown in liquid  
388 Marine Broth at 25°C. After 48 hours, cells were pelleted and washed with Tibbles-Rawling  
389 minimal media twice. PsychB3M02 cells were then transferred at a starting OD of 0.005 to  
390 Tibbles-Rawling minimal media with 0.15% alginate (Sigma, #A1112) as the sole carbon  
391 source, and incubated in 10 mL volumes at 20°C and with overhead rotation. After 24h, the  
392 spent media was harvested by gently pelleting the cells (3000 rcf for 10 min) and filtering the  
393 supernatant through a 0.2 µm syringe filter. The five alginate non-degraders were pre-grown  
394 and harvested in a similar manner and transferred to fresh raw spent media at a starting OD of  
395 0.005 in 200µl volumes. Growth was measured using OD600 on a Synergy2 microplate reader  
396 (BioTek).

### 397 **Genome sequencing**

398 For selected isolates from our collection, genomic DNA was extracted from a liquid overnight  
399 culture in Marine Broth 2216 (Difco #279110) using the Agincourt DNA Advance Kit  
400 (Beckman Coulter #A48705). Genomes were sequenced using the Nextera DNA Library  
401 Preparation Kit (Illumina #FC-121-1031)<sup>30</sup>. Sequencing was performed on an Illumina HiSeq  
402 2500 (250x250 bp paired-end reads) at the Whitehead Institute for Biomedical Research (MIT,  
403 Cambridge, MA, U.S.A.). Genomes were assembled using CLC Genomics Workbench 11

404 (Qiagen), curated using CheckM<sup>31</sup>. Open reading frames were annotated using the RAST  
405 pipeline<sup>32</sup> and the CAZY database<sup>33</sup>, run from the dbCAN2 server<sup>34</sup>. Sequences were deposited  
406 in project PRJNA478695.

#### 407 **Metabolomics**

408 Metabolomics was performed at the Microbial Biogeochemistry Group at the Woods Hole  
409 Oceanographic Institution. To extract the metabolites from the spent media, the filtrate was  
410 acidified to a pH ~3 using 12 M hydrochloric acid and the extracellular organic compounds  
411 extracted using Bond Elut PPL cartridges (1 g/6 ml sized cartridges, Agilent) following the  
412 protocol of Dittmar et al.<sup>35</sup> as modified by Longnecker<sup>36</sup>. Dissolved organic matter was eluted  
413 from the cartridges using 100% methanol. The resulting organic matter extracts were analyzed  
414 using targeted mass spectrometry. Briefly, the extracts for targeted analysis were re-dissolved  
415 in 95:5 (v/v) water:acetonitrile with deuterated biotin (final concentration 0.05 mg ml<sup>-1</sup>).  
416 Samples were then analyzed by ultra performance liquid chromatography (Accela Open  
417 Autosampler and Accela 1250 Pump, Thermo Scientific) coupled to a heated electrospray  
418 ionization source (H-ESI) and a triple quadrupole mass spectrometer (TSQ Vantage, Thermo  
419 Scientific) operated under selected reaction monitoring (SRM) mode. Chromatographic  
420 separation was performed on a Waters Acquity HSS T3 column (2.1 × 100 mm, 1.8 μm)  
421 equipped with a Vanguard pre-column and maintained at 40 °C. The column was eluted with  
422 (A) 0.1% formic acid in water and (B) 0.1% formic acid in acetonitrile at a flow rate of 0.5 mL  
423 min<sup>-1</sup>. The gradient was programmed as follows: start 1% B for 1 min, ramp to 15% B from 1-  
424 3 min, ramp to 50% from 3-6 min, ramp to 95% B from 6-9 min, hold until 10 min, ramp to 1%  
425 from 10-10.2 min, and a final hold at 1% B (total gradient time 12 min). Separate autosampler  
426 injections of 5 μL each were made for positive and negative ion modes.

427 The samples were analyzed in a random order with a pooled sample run after every six  
428 samples. The mass spectrometer was operated in selected reaction monitoring (SRM) mode;  
429 optimal SRM parameters (s-lens, collision energy) for each target compound were optimized  
430 individually using an authentic standard<sup>37</sup>. Two SRM transitions per compound were monitored  
431 for quantification and confirmation. Eight-point external calibration curves based on peak area  
432 were generated for each compound. The resulting data were converted to mzML files using the  
433 msConvert tool<sup>38</sup> and processed with MAVEN<sup>39</sup>.

434

#### 435 **Acknowledgements**

436 We thank Gabriel E. Leventhal, Shaul Pollak Pasternak and Elizabeth Kujawinski for their  
437 comments and careful reading of the manuscript. We also thank all members of the Cordero

438 lab, and in particular José Saavedra and Matthew Metzger for their support. This project was  
439 supported by Simons Early Career Award 410104, the Alfred P Sloan fellowship FG-20166236  
440 and the Simons Collaboration: Principles of Microbial Ecosystems (PriME), award number  
441 542395.

442

443 **Contributions**

444 MSD, NC and OXC designed the study. MSD, NC, TNE, JS, DS, and JB executed the study.

445 MSD, TNE, JS, DS and OXC analyzed the results. TNE and OXC wrote the paper.



## 446 References

- 447 1. Wagner, G. P., Pavlicev, M. & Cheverud, J. M. The road to modularity. *Nat. Rev.*  
448 *Genet.* **8**, 921–931 (2007).
- 449 2. Nash, P. D. Why modules matter. *FEBS Lett.* **586**, 2572–2574 (2012).
- 450 3. Crosa, J. H. & Walsh, C. T. Genetics and assembly line enzymology of siderophore  
451 biosynthesis in bacteria. *Microbiol. Mol. Biol. Rev.* **66**, 223–49 (2002).
- 452 4. Ulrich, L. E., Koonin, E. V & Zhulin, I. B. One-component systems dominate signal  
453 transduction in prokaryotes. *Trends Microbiol.* **13**, 52–6 (2005).
- 454 5. Kreimer, A., Borenstein, E., Gophna, U. & Ruppin, E. The evolution of modularity in  
455 bacterial metabolic networks. *Proc. Natl. Acad. Sci.* **105**, 6976–6981 (2008).
- 456 6. Jacob, F. & Francois. Evolution and tinkering. *Science (80-. )*. **196**, 1161–1166 (1977).
- 457 7. Nemergut, D. R. *et al.* Patterns and processes of microbial community assembly.  
458 *Microbiol. Mol. Biol. Rev.* **77**, 342–56 (2013).
- 459 8. Fukami, T. & Nakajima, M. Community assembly: alternative stable states or  
460 alternative transient states? *Ecol. Lett.* **14**, 973–84 (2011).
- 461 9. Cordero, O. X., Snel, B. & Hogeweg, P. Coevolution of gene families in prokaryotes.  
462 *Genome Res.* **18**, 462–8 (2008).
- 463 10. Olesen, J. M., Bascompte, J., Dupont, Y. L. & Jordano, P. The modularity of  
464 pollination networks. *Proc. Natl. Acad. Sci. U. S. A.* **104**, 19891–6 (2007).
- 465 11. Alldredge, A. L. & Silver, M. W. Characteristics, dynamics and significance of marine  
466 snow. *Prog. Oceanogr.* **20**, 41–82 (1988).
- 467 12. Grossart, H.-P., Kjørboe, T., Tang, K. & Ploug, H. Bacterial colonization of particles:  
468 growth and interactions. *Appl. Environ. Microbiol.* **69**, 3500–9 (2003).
- 469 13. Cordero, O. X. & Datta, M. S. Microbial interactions and community assembly at  
470 microscales. *Curr. Opin. Microbiol.* **31**, 227–234 (2016).
- 471 14. Datta, M. S., Sliwerska, E., Gore, J., Polz, M. F. & Cordero, O. X. Microbial  
472 interactions lead to rapid micro-scale successions on model marine particles. *Nat.*  
473 *Commun.* **7**, 11965 (2016).
- 474 15. Durkin, C. A., Mock, T. & Armbrust, E. V. Chitin in Diatoms and Its Association with  
475 the Cell Wall. *Eukaryot. Cell* **8**, 1038–1050 (2009).
- 476 16. Jeuniaux, C. & Voss-Foucart, M. F. Chitin biomass and production in the marine  
477 environment. *Biochem. Syst. Ecol.* **19**, 347–356 (1991).
- 478 17. Usov, A. I. Polysaccharides of the red algae. in *Advances in carbohydrate chemistry*  
479 *and biochemistry* **65**, 115–217 (2011).
- 480 18. Callahan, B. J. *et al.* DADA2: High-resolution sample inference from Illumina  
481 amplicon data. *Nat. Methods* **13**, 581–583 (2016).
- 482 19. Weiner, R. M. *et al.* Complete Genome Sequence of the Complex Carbohydrate-  
483 Degrading Marine Bacterium, *Saccharophagus degradans* Strain 2-40T. *PLoS Genet.* **4**,  
484 e1000087 (2008).
- 485 20. Kabisch, A. *et al.* Functional characterization of polysaccharide utilization loci in the

- 486 marine Bacteroidetes ‘Gramella forsetii’ KT0803. *ISME J.* **8**, 1492–1502 (2014).
- 487 21. Cottrell, M. T. & Kirchman, D. L. Natural assemblages of marine proteobacteria and  
488 members of the Cytophaga-Flavobacter cluster consuming low- and high-molecular-  
489 weight dissolved organic matter. *Appl. Environ. Microbiol.* **66**, 1692–7 (2000).
- 490 22. Gómez-Pereira, P. R. *et al.* Genomic content of uncultured Bacteroidetes from  
491 contrasting oceanic provinces in the North Atlantic Ocean. *Environ. Microbiol.* **14**, 52–  
492 66 (2012).
- 493 23. Longnecker, K., Futrelle, J., Coburn, E., Kido Soule, M. C. & Kujawinski, E. B.  
494 Environmental metabolomics: Databases and tools for data analysis. *Mar. Chem.* **177**,  
495 366–373 (2015).
- 496 24. Braakman, R. & Smith, E. The compositional and evolutionary logic of metabolism.  
497 *Phys. Biol.* **10**, 11001 (2012).
- 498 25. Enke, T. N., Leventhal, G. E., Metzger, M., Saavedra, J. T. & Cordero, O. X. Micro-  
499 scale ecology regulates particulate organic matter turnover in model marine microbial  
500 communities. *bioRxiv* (2018).
- 501 26. Callahan, B. J. *et al.* DADA2: High-resolution sample inference from Illumina  
502 amplicon data. *Nat. Methods* **13**, 581–583 (2016).
- 503 27. Price, M. N., Dehal, P. S. & Arkin, A. P. FastTree 2 – Approximately Maximum-  
504 Likelihood Trees for Large Alignments. *PLoS One* **5**, e9490 (2010).
- 505 28. Letunic, I. & Bork, P. Interactive tree of life (iTOL) v3: an online tool for the display  
506 and annotation of phylogenetic and other trees. *Nucleic Acids Res.* **44**, W242–W245  
507 (2016).
- 508 29. Wang, Q., Garrity, G. M., Tiedje, J. M. & Cole, J. R. Naive Bayesian classifier for  
509 rapid assignment of rRNA sequences into the new bacterial taxonomy. *Appl. Environ.*  
510 *Microbiol.* **73**, 5261–7 (2007).
- 511 30. Baym, M. *et al.* Inexpensive Multiplexed Library Preparation for Megabase-Sized  
512 Genomes. *PLoS One* **10**, e0128036 (2015).
- 513 31. Parks, D. H., Imelfort, M., Skennerton, C. T., Hugenholtz, P. & Tyson, G. W. CheckM:  
514 assessing the quality of microbial genomes recovered from isolates, single cells, and  
515 metagenomes. *Genome Res.* **25**, 1043–1055 (2015).
- 516 32. Aziz, R. K. *et al.* The RAST Server: rapid annotations using subsystems technology.  
517 *BMC Genomics* **9**, 75 (2008).
- 518 33. Lombard, V., Golaconda Ramulu, H., Drula, E., Coutinho, P. M. & Henrissat, B. The  
519 carbohydrate-active enzymes database (CAZy) in 2013. *Nucleic Acids Res.* **42**, D490-5  
520 (2014).
- 521 34. Zhang, H. *et al.* dbCAN2: a meta server for automated carbohydrate-active enzyme  
522 annotation. *Nucleic Acids Res.* (2018). doi:10.1093/nar/gky418
- 523 35. Dittmar, T., Koch, B., Hertkorn, N. & Kattner, G. A simple and efficient method for  
524 the solid-phase extraction of dissolved organic matter (SPE-DOM) from seawater.  
525 *Limnol. Oceanogr. Methods* **6**, 230–235 (2008).
- 526 36. Longnecker, K. Dissolved organic matter in newly formed sea ice and surface  
527 seawater. *Geochim. Cosmochim. Acta* **171**, 39–49 (2015).

- 528 37. Kido Soule, M. C., Longnecker, K., Johnson, W. M. & Kujawinski, E. B.  
529 Environmental metabolomics: Analytical strategies. *Mar. Chem.* **177**, 374–387 (2015).
- 530 38. Chambers, M. C. *et al.* A cross-platform toolkit for mass spectrometry and proteomics.  
531 *Nat. Biotechnol.* **2012 3010** (2012).
- 532 39. Clasquin, M. F., Melamud, E. & Rabinowitz, J. D. LC-MS Data Processing with  
533 MAVEN: A Metabolomic Analysis and Visualization Engine. in *Current Protocols in*  
534 *Bioinformatics* (John Wiley & Sons, Inc., 2012). doi:10.1002/0471250953.bi1411s37
- 535
